# Supplementary material for: Substantial increases in future precipitation extremes – insights from a large ensemble of downscaled CMIP6 models
Source: Research Square preprint supplement (doi:10.21203/rs.3.rs-6291947/v1), 2025-04-21
Supplement: Supplementary file 1 [file 9fe50de11a24c92138d7772e.docx]

**Substantial increases in future precipitation extremes – insights from a large ensemble of downscaled CMIP6 models**

Rohan Eccles1*, Jozef Syktus2, Ralph Trancoso1,2, Sarah Chapman1,2, Conrad Wasko3, Jason P. Evans4,5, Marcus Thatcher6, Giovanni Di Virgilio5,7, Christian Stassen8

*1 Climate Projections and Services, Queensland Treasury, Queensland Government, Brisbane, Australia*

*2 School of The Environment, The University of Queensland, Brisbane, Australia*

*3 School of Civil Engineering, The University of Sydney, Sydney, NSW, Australia*

*4 Climate Change Research Centre, School of Biological, Earth and Environmental Sciences, University of New South Wales, Sydney, Australia*

*5 Australian Research Council Centre of Excellence for Weather of the 21st Century, University of New South Wales, Sydney, Australia*

*6 CSIRO Environment, Melbourne, VIC, Australia*

*7 Climate & Atmospheric Science, NSW Department of Climate Change, Energy, the Environment and Water, Sydney, Australia*

*8 Bureau of Meteorology, Melbourne, Australia*

**Supplementary Material**

This supplementary material contains Figure S1 to Figure S2 and Table S1 to Table S4.

# Ensemble evaluation

Table S1. Percent bias of the mean precipitation over capital city regions for each of the model ensembles compared to AGCD for 1981-2020. Mean Absolute Percentage Error (MAPE) biases are presented for all capital city areas and across Australia as a whole.

| **Region** | **CMIP6** | **QldFCP-2** | **CCAM-ACS** | **BARPA-ACS** | **NARCliM2** |
| --- | --- | --- | --- | --- | --- |
| ACT | 2.0 | -25.8 | 2.4 | -3.0 | -8.6 |
| Adelaide | -26.4 | -20.8 | -1.9 | 12.5 | -37.1 |
| Brisbane | 4.8 | 5.8 | 11.1 | 9.6 | -11.9 |
| Darwin | -9.4 | -31.2 | -2.9 | -12.5 | -29.7 |
| Hobart | 24.3 | -28.0 | -5.4 | -16.0 | -15.9 |
| Melbourne | -6.6 | -17.2 | -5.9 | 6.9 | -27.0 |
| Perth | -36.2 | -47.4 | -17.9 | -13.4 | -42.6 |
| Sydney | -6.1 | -23.7 | 1.7 | 2.7 | -16.4 |
| **MAPE capital cities** | 14.5 | 25.0 | 6.1 | 9.6 | 23.6 |
| **MAPE Australia** | 23.1 | 18.8 | 30.8 | 16.4 | 20.9 |

Table S2. Percent bias of the 99th percentile precipitation over capital city regions for each of the model ensembles compared to AGCD for 1981-2020. Mean Absolute Percentage Error (MAPE) biases are presented for all capital city areas and across Australia as a whole.

| **Region** | **CMIP6** | **QldFCP-2** | **CCAM-ACS** | **BARPA-ACS** | **NARCliM2** |
| --- | --- | --- | --- | --- | --- |
| ACT | -19.3 | -15.7 | 7.9 | -3.2 | -7.9 |
| Adelaide | -26.7 | -5.9 | 9.7 | 4.3 | -26.0 |
| Brisbane | -15.0 | 1.3 | 9.6 | 8.1 | -10.0 |
| Darwin | -15.2 | -28.1 | 2.8 | -16.6 | -17.1 |
| Hobart | -26.7 | -28.2 | -9.0 | -5.3 | -12.9 |
| Melbourne | -15.8 | -4.9 | 6.4 | 2.7 | -15.9 |
| Perth | -37.1 | -29.9 | -0.5 | -5.5 | -31.2 |
| Sydney | -21.7 | -13.7 | 7.1 | 2.4 | -8.2 |
| **MAPE capital cities** | 22.2 | 16.0 | 6.6 | 6.0 | 16.1 |
| **MAPE Australia** | 14.6 | 22.5 | 19.5 | 13 | 21.3 |

Table S3. Percent bias of the 99.7th percentile precipitation over capital city regions for each of the model ensembles compared to AGCD for 1981-2020. Mean Absolute Percentage Error (MAPE) biases are presented for all capital city areas and across Australia as a whole.

| **Region** | **CMIP6** | **QldFCP-2** | **CCAM-ACS** | **BARPA-ACS** | **NARCliM2** |
| --- | --- | --- | --- | --- | --- |
| ACT | -22.8 | -7.8 | 13.5 | 0.4 | -6.8 |
| Adelaide | -19.6 | 3.1 | 19.9 | 7.3 | -16.9 |
| Brisbane | -22.7 | 7.4 | 14.8 | 16.5 | -4.3 |
| Darwin | -15.9 | -6.1 | 21.7 | 2.0 | 1.2 |
| Hobart | -34.6 | -24.4 | -10.8 | 0.8 | -11.9 |
| Melbourne | -14.5 | 2.1 | 16.4 | 6.2 | -8.3 |
| Perth | -35.7 | -21.3 | 5.4 | -1.4 | -25.5 |
| Sydney | -27.9 | -5.7 | 11.6 | 5.8 | -1.3 |
| **MAPE capital cities** | 24.2 | 9.7 | 14.3 | 5.0 | 9.5 |
| **MAPE Australia** | 14.8 | 19.7 | 26.4 | 14.2 | 13.2 |

# Changes across Australia


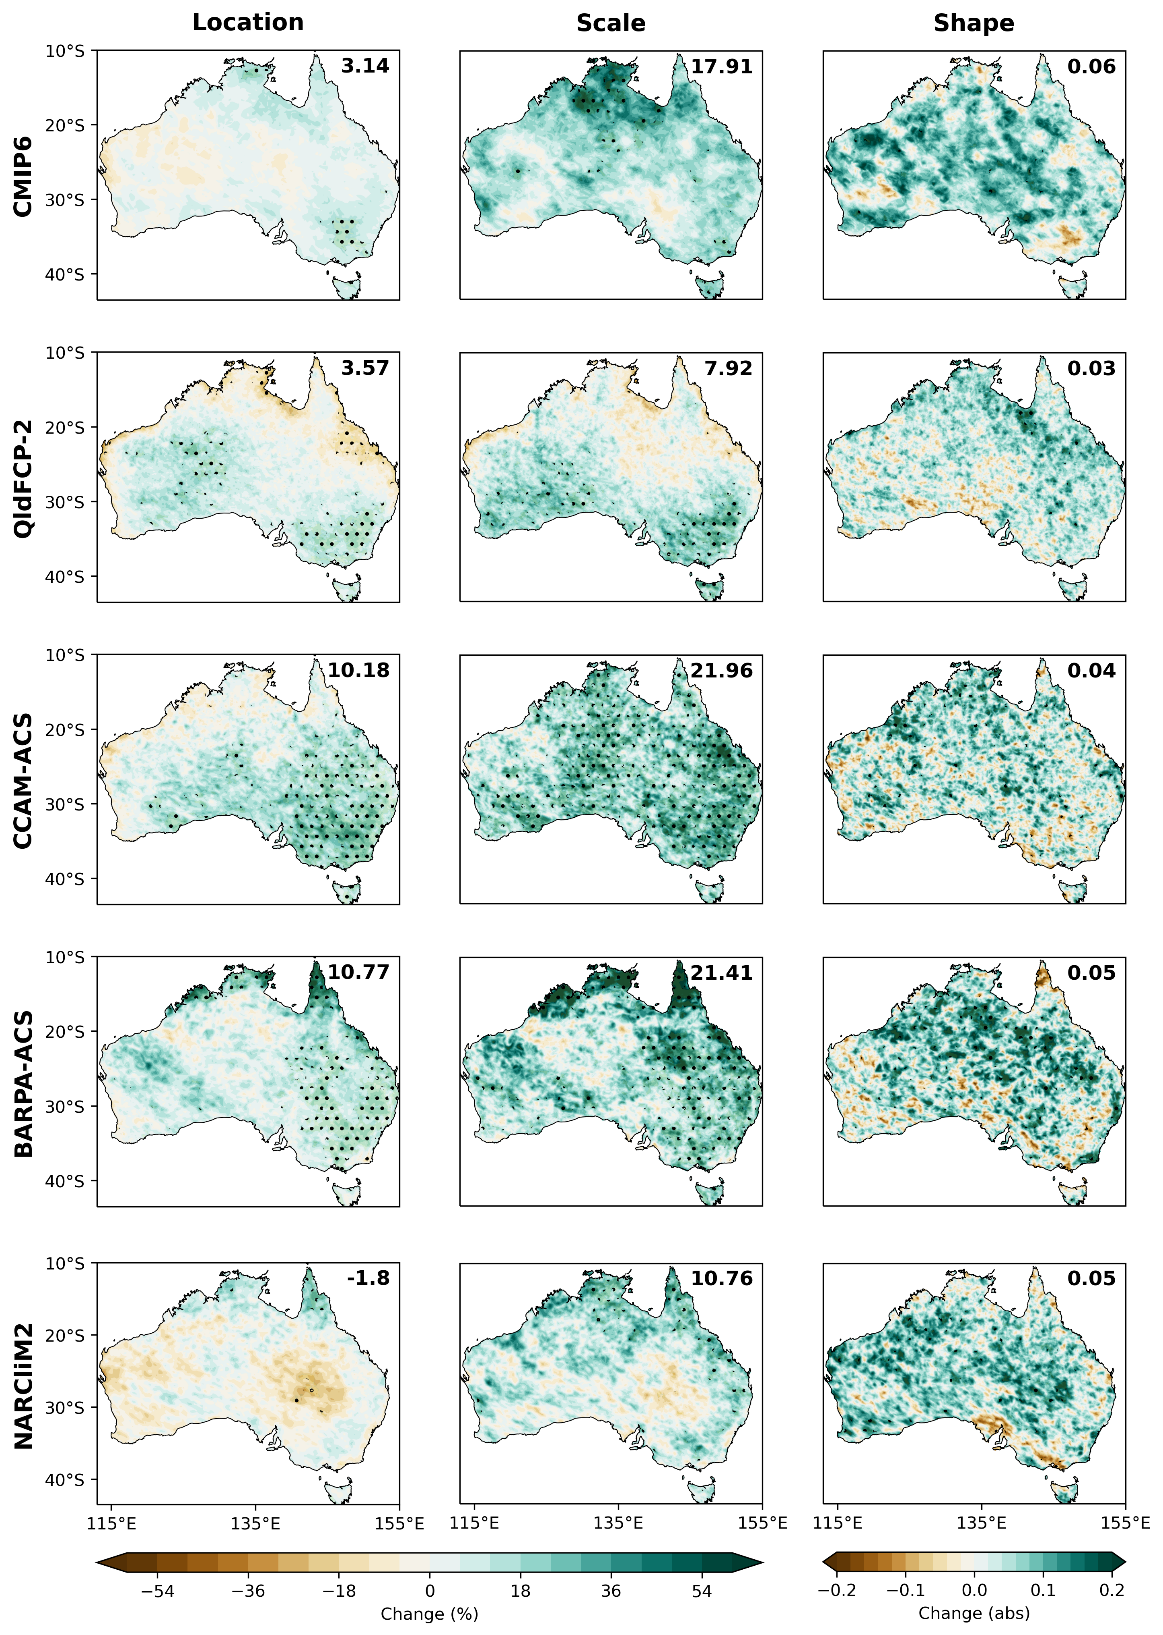


***Figure S1****. Comparison of ensemble median change to the location, scale, and shape parameters by the end of the century (2071-2100) compared to the reference period (1981-2010) under SSP370. Highlighted values show the average changes over Australia in percent from the multi-model median, stippling shows where the signal-to-noise ratio > 1.0.*

# Changes to Capital Cities


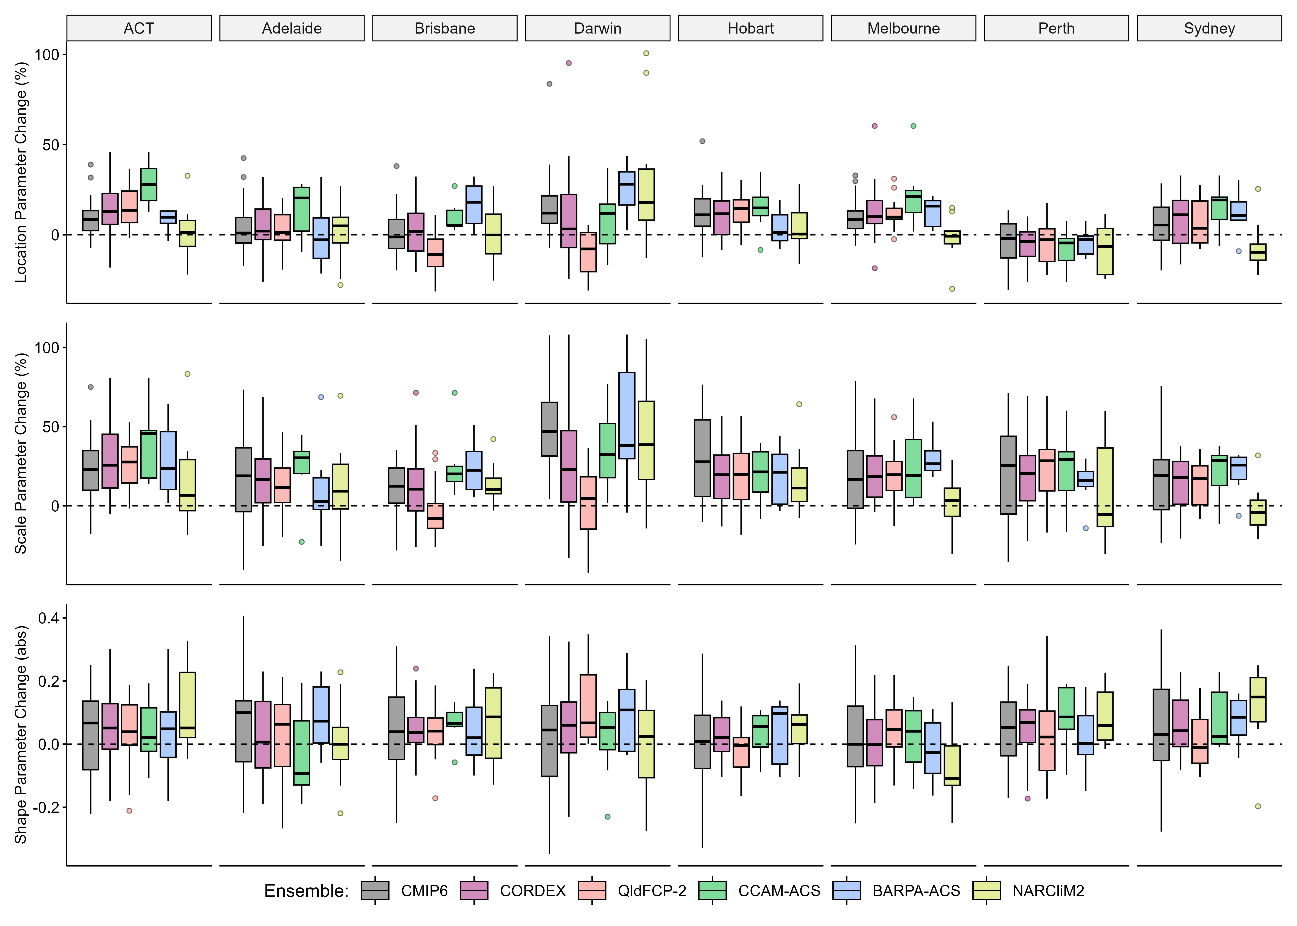


***Figure S2****. Changes to the location, scale, and shape parameters by the end of the century (2071-2100) compared to the reference period (1981-2010) under SSP370. Boxplots show variability in projected changes within greater capital city regions from each of the model ensembles.*

Table S4. Summary of the median and range (10th to 90th percentile) of changes to mean and extreme precipitation per degree of global warming (%/K) from downscaled and host models for Australian greater capital city regions.

| **City** | **Model Type** | **Mean** | **99th percentile** | **99.7th percentile** | **1 in 10 AEP** | **1 in 50 AEP** | **1 in 100 AEP** |
| --- | --- | --- | --- | --- | --- | --- | --- |
| ACT | Downscaled | -0.7 (-5.8 - 5.7) | 1.9 (-1.8 - 6.4) | 4 (-1.4 - 8.7) | 6.5 (1 - 12.3) | 8.7 (0.5 - 16.6) | 9.3 (-0.3 - 19) |
| Host | -0.9 (-5.2 - 3.2) | 2.5 (-1.7 - 5.2) | 2.5 (-0.6 - 6.5) | 4.9 (0.4 - 8.4) | 6.8 (-2.2 - 12) | 8.2 (-4.1 - 15.7) |
| Adelaide | Downscaled | -4.5 (-11 - 2.8) | -0.4 (-6.5 - 4.8) | 2 (-4.4 - 6.7) | 3.4 (-4 - 8.3) | 4.2 (-5.1 - 12.5) | 4 (-5.9 - 15.5) |
| Host | -5 (-7.5 - 0.3) | -0.1 (-6 - 5.9) | 1.1 (-2.6 - 9.2) | 4.3 (-3.4 - 12.4) | 7 (-5.3 - 19.2) | 9 (-6.1 - 21.9) |
| Brisbane | Downscaled | -1.2 (-6.3 - 4.2) | -0.8 (-7.4 - 3.8) | 0.4 (-7 - 5.2) | 3.6 (-4.4 - 11) | 6.5 (-4.3 - 15.1) | 7.6 (-5 - 17.8) |
| Host | -1.6 (-6.5 - 3.3) | -0.7 (-4.4 - 4.8) | 0.7 (-3.8 - 6.6) | 2.4 (-2.2 - 8.6) | 3.6 (-4.9 - 14.4) | 3.7 (-8 - 17.2) |
| Darwin | Downscaled | 0.5 (-5.9 - 5.6) | 1.3 (-5.4 - 7.1) | 3.7 (-6 - 11.6) | 7.7 (-2.2 - 14.7) | 9.2 (-2.5 - 20.8) | 11.9 (-2.6 - 24.6) |
| Host | -0.2 (-6.9 - 3.8) | 2.7 (-0.6 - 6.9) | 5.3 (2.8 - 10) | 8.8 (3.5 - 13.6) | 11.3 (3.5 - 19.1) | 12.2 (3.4 - 21.3) |
| Hobart | Downscaled | -1.8 (-5.9 - 2.6) | 0.8 (-3.9 - 4.4) | 2.7 (-2.2 - 6.4) | 3.8 (-0.3 - 10) | 5 (-2.3 - 12.7) | 5.5 (-3.6 - 14.2) |
| Host | -0.5 (-2.6 - 2.7) | 3.5 (-0.8 - 6.3) | 4.1 (-0.7 - 6.9) | 4.8 (0 - 10.7) | 4.3 (0.6 - 14) | 5.1 (-0.2 - 15.3) |
| Melbourne | Downscaled | -2.6 (-7.3 - 2.3) | 1.8 (-2.2 - 5.8) | 3.2 (-1.5 - 6.7) | 3.8 (-1 - 10.4) | 3.6 (-3.5 - 14.6) | 3.4 (-5.9 - 16.8) |
| Host | -3.6 (-6.1 - 0.2) | 1.9 (-1.8 - 4.9) | 3.1 (-0.8 - 7) | 2.3 (-1.2 - 10.2) | 4.4 (-1.7 - 13.6) | 5 (-2.9 - 14.2) |
| Perth | Downscaled | -9.3 (-15.5 - -4.4) | -4.6 (-11 - -0.1) | -2.2 (-8 - 2) | 1.7 (-4.7 - 9.6) | 3.7 (-3.4 - 15.5) | 4.4 (-4.9 - 17.9) |
| Host | -9.4 (-12.3 - -5.2) | -4 (-8.6 - -1.5) | -0.2 (-6.4 - 2.4) | 3.6 (-5.1 - 9) | 5.7 (-5.7 - 14.5) | 6.3 (-6.3 - 18.1) |
| Sydney | Downscaled | 0.6 (-4.1 - 6) | -0.4 (-5.1 - 4.5) | 1.7 (-3.2 - 6.2) | 4 (-2.3 - 9.6) | 6.4 (-1.9 - 14.4) | 7.3 (-1.7 - 17) |
| Host | -1.2 (-4 - 3.2) | 0.6 (-3 - 3.6) | 2.5 (-1.8 - 5.2) | 3.4 (-1.6 - 8.7) | 4.2 (-2 - 10.7) | 5.7 (-2.2 - 13.8) |
